# Supplementary material
Source: publisher figshare collection journal article supplement (https://acs.figshare.com/ndownloader/files/10405119)
Supplement: Supplementary file 1 [file 10405119]

## Supplementary Information

Polymerization kinetics of n-butyl methacrylate in the presence of  
graphene oxide prepared by two different oxidation methods with or  
without functionalization

*Ioannis S. Tsagkalias, Symela Papadopoulou, George D. Verros, Dimitris S. Achilias\**

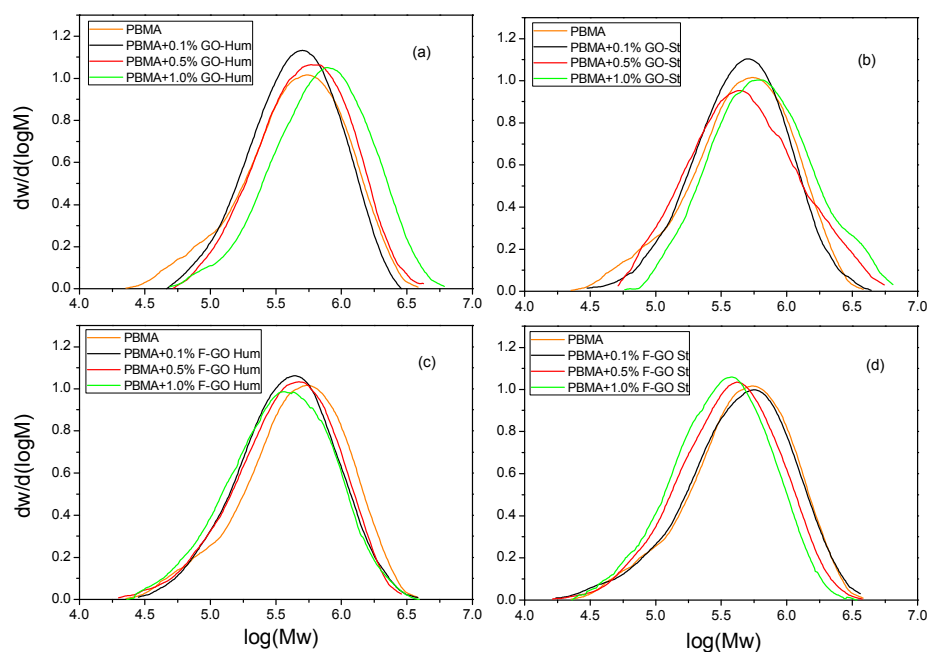

**Figure S1.** Full Molecular Weight Distribution of neat PBMA and its nanocomposites with 0.1, 0.5 and 1.0 wt% GO prepared by the method of Hummer's (a), GO prepared by the method of Staudenmaier (b), F-GO prepared by the method of Hummer's (c) and F-GO prepared by the method of Staudenmaier (d).
